# Supplementary material for: Association of Common Variants in TNFRSF13B, TNFSF13, and ANXA3 with Serum Levels of Non-Albumin Protein and Immunoglobulin Isotypes in Japanese
Source: PubMed Central journal article supplement (PMC3338726; doi:10.1371/journal.pone.0032683), 2012-04-27

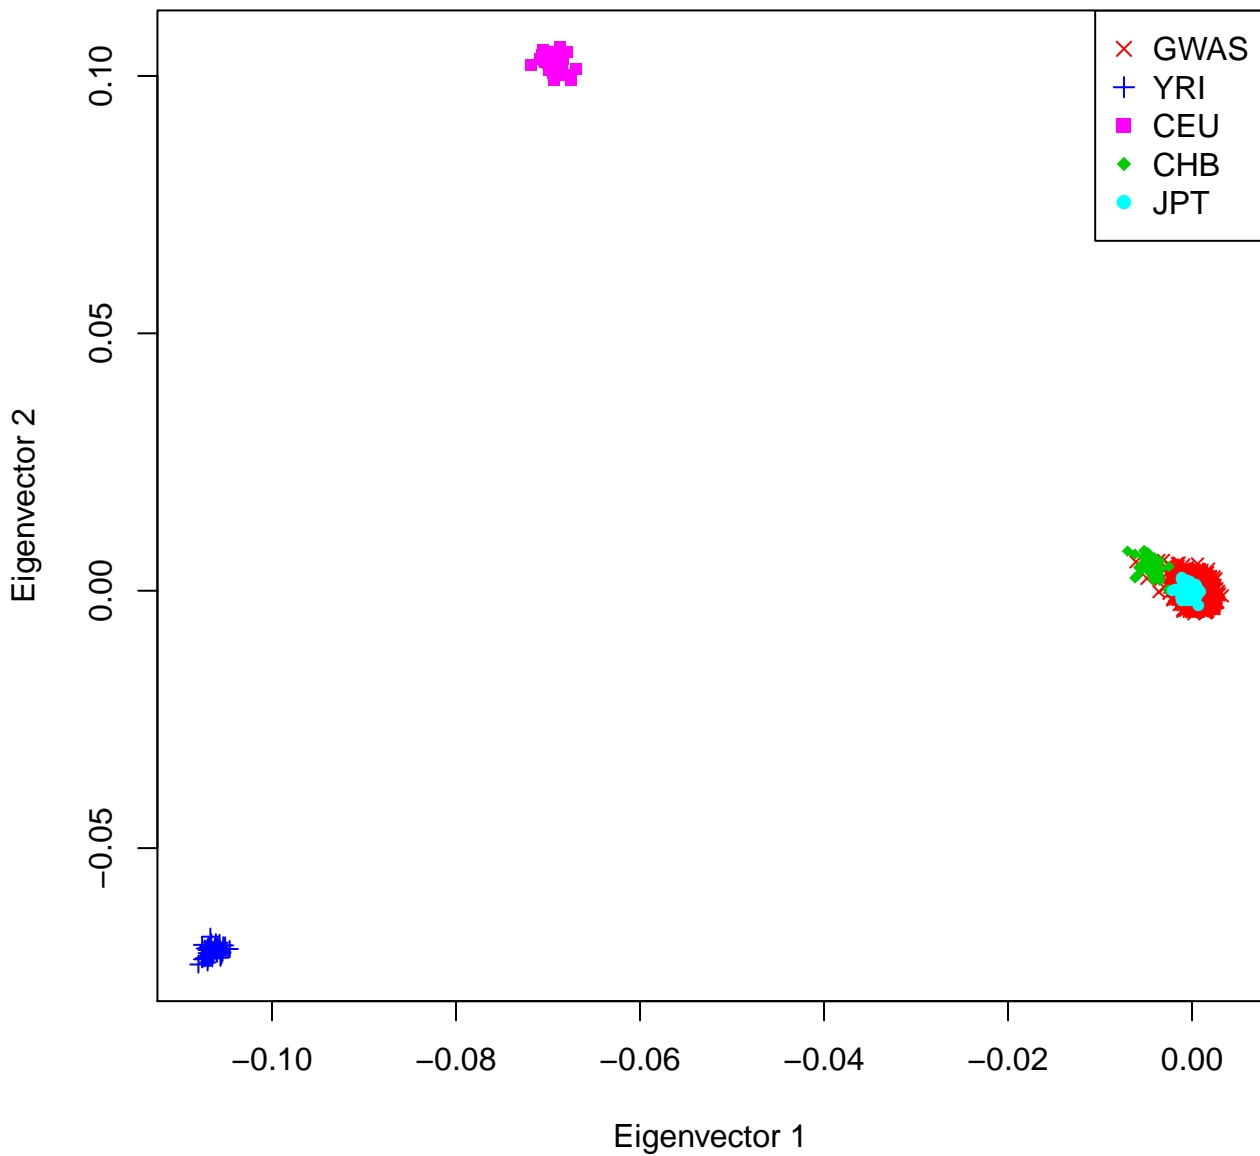

Supplement: pone.0032683.s001.pdf [file pone.0032683.s001.pdf]
