# Supplementary material for: Association of Common Variants in TNFRSF13B, TNFSF13, and ANXA3 with Serum Levels of Non-Albumin Protein and Immunoglobulin Isotypes in Japanese
Source: PubMed Central journal article supplement (PMC3338726; doi:10.1371/journal.pone.0032683), 2012-04-27
Supplement: pone.0032683.s003.pdf [file pone.0032683.s003.pdf]

(A) rs4985726; 0: CC, 1: CG, 2: GG

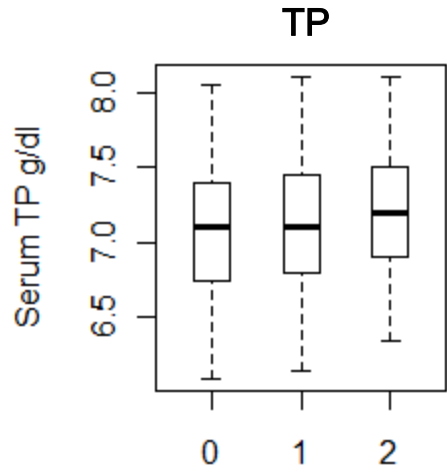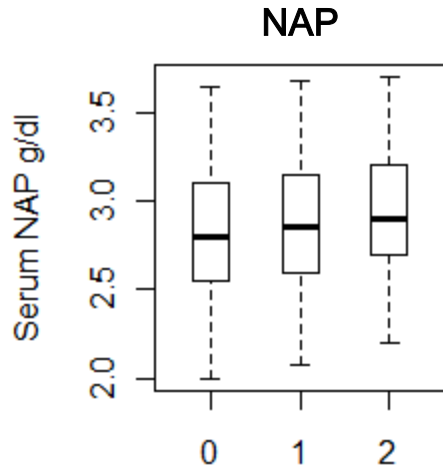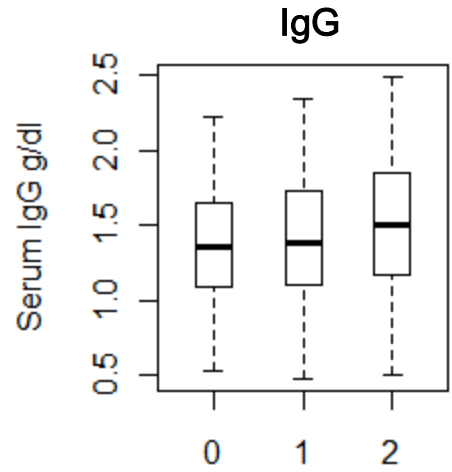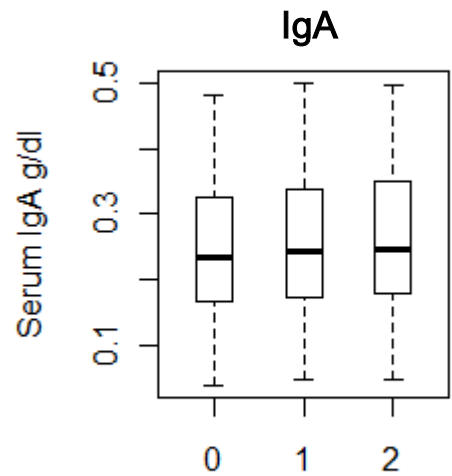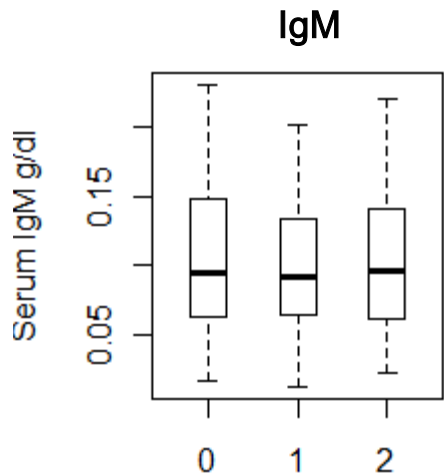

|                         |       |       |       |
|-------------------------|-------|-------|-------|
| Number                  | 4,167 | 4,962 | 1,563 |
| Average/genotype (g/dl) | 7.05  | 7.11  | 7.16  |

|                         |       |       |       |
|-------------------------|-------|-------|-------|
| Number                  | 4,166 | 4,964 | 1,565 |
| Average/genotype (g/dl) | 2.83  | 2.90  | 2.95  |

|                         |      |      |      |
|-------------------------|------|------|------|
| Number                  | 644  | 874  | 244  |
| Average/genotype (g/dl) | 1.38 | 1.43 | 1.51 |

|                         |      |      |      |
|-------------------------|------|------|------|
| Number                  | 616  | 821  | 237  |
| Average/genotype (g/dl) | 0.26 | 0.28 | 0.27 |

|                         |      |      |      |
|-------------------------|------|------|------|
| Number                  | 644  | 775  | 229  |
| Average/genotype (g/dl) | 0.12 | 0.11 | 0.11 |

**(B) rs3803800; 0: AA, 1: AG, 2: GG**

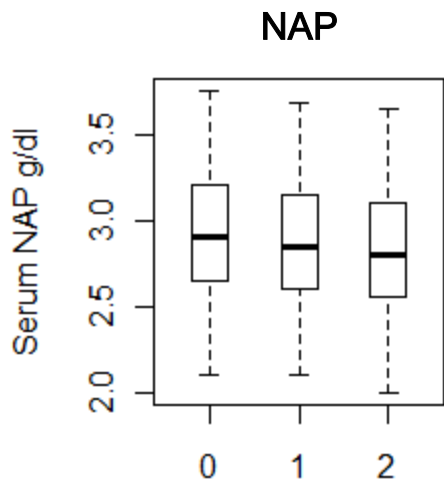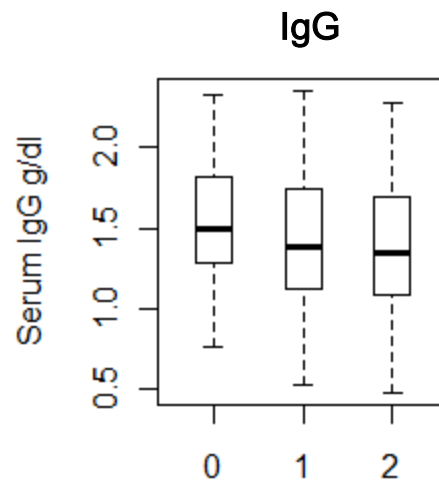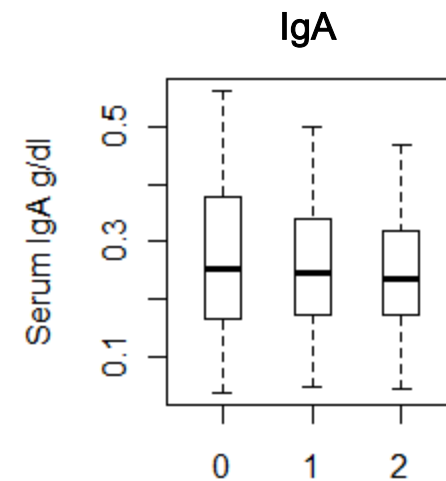

|                         |       |       |       |
|-------------------------|-------|-------|-------|
| Number                  | 1,061 | 4,549 | 5,120 |
| Average/genotype (g/dl) | 2.94  | 2.90  | 2.85  |

|      |      |      |
|------|------|------|
| 154  | 789  | 848  |
| 1.63 | 1.44 | 1.41 |

|      |      |      |
|------|------|------|
| 148  | 740  | 784  |
| 0.29 | 0.28 | 0.26 |

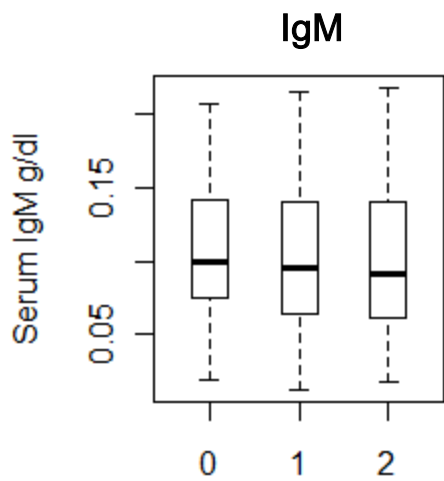

|                         |      |      |      |
|-------------------------|------|------|------|
| Number                  | 151  | 722  | 776  |
| Average/genotype (g/dl) | 0.12 | 0.11 | 0.11 |

(C) rs11552708; 0: AA, 1: AG, 2: GG

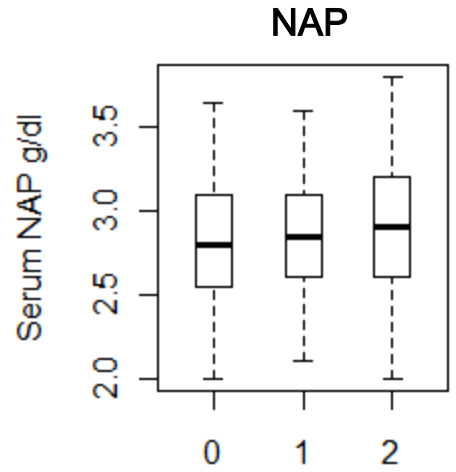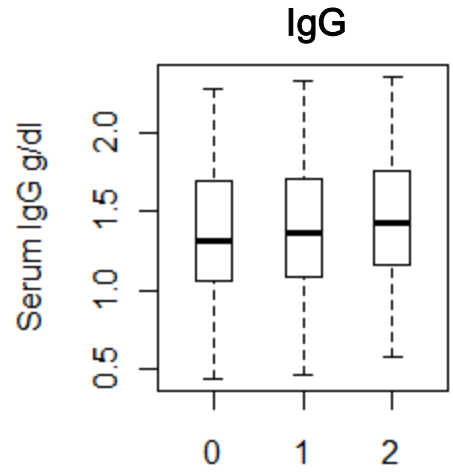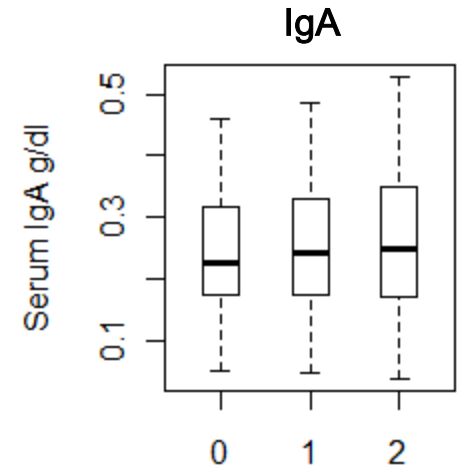

|                         |       |       |       |
|-------------------------|-------|-------|-------|
| Number                  | 1,765 | 5,089 | 3,876 |
| Average/genotype (g/dl) | 2.84  | 2.87  | 2.91  |

|                         |      |      |      |
|-------------------------|------|------|------|
| Number                  | 308  | 844  | 639  |
| Average/genotype (g/dl) | 1.39 | 1.41 | 1.50 |

|                         |      |      |      |
|-------------------------|------|------|------|
| Number                  | 288  | 800  | 584  |
| Average/genotype (g/dl) | 0.25 | 0.27 | 0.28 |

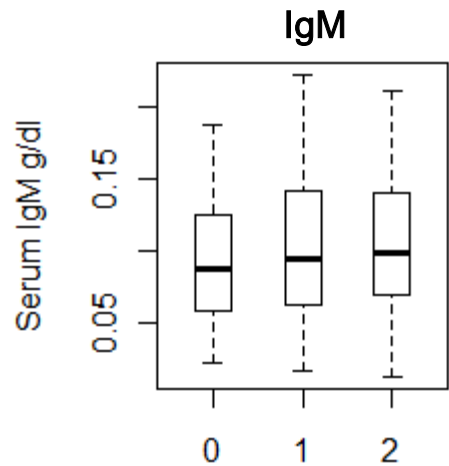

|                         |      |      |      |
|-------------------------|------|------|------|
| Number                  | 285  | 781  | 583  |
| Average/genotype (g/dl) | 0.10 | 0.11 | 0.12 |

(D) rs10007186; 0: CC, 1: TC, 2: TT

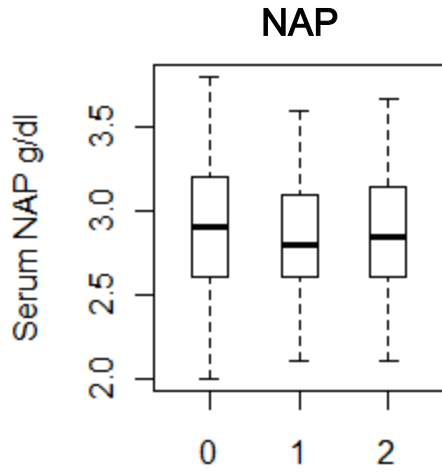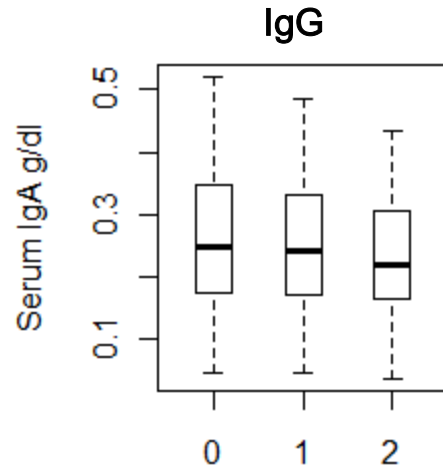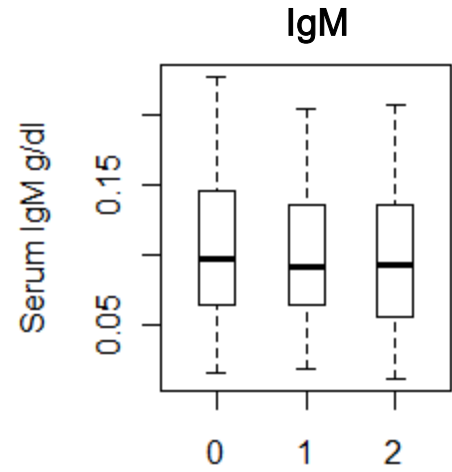

|                         |       |       |       |
|-------------------------|-------|-------|-------|
| Number                  | 1,639 | 4,536 | 4,520 |
| Average/genotype (g/dl) | 2.94  | 2.86  | 2.88  |

|      |      |      |
|------|------|------|
| 756  | 729  | 188  |
| 0.27 | 0.27 | 0.25 |

|      |      |      |
|------|------|------|
| 754  | 711  | 183  |
| 0.12 | 0.11 | 0.10 |

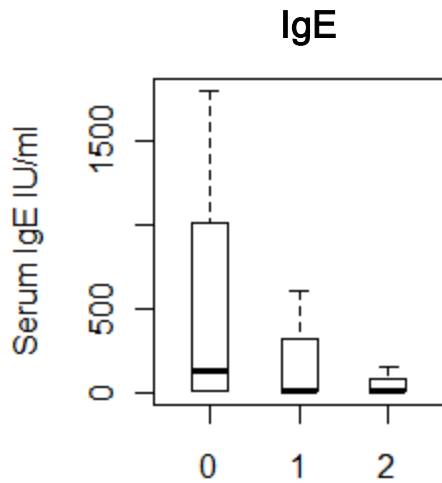

|                          |         |         |        |
|--------------------------|---------|---------|--------|
| Number                   | 144     | 242     | 162    |
| Average/genotype (IU/ml) | 1646.82 | 1516.59 | 698.35 |

(E) rs1260326; 0: CC, 1: TC, 2: TT

### ALB

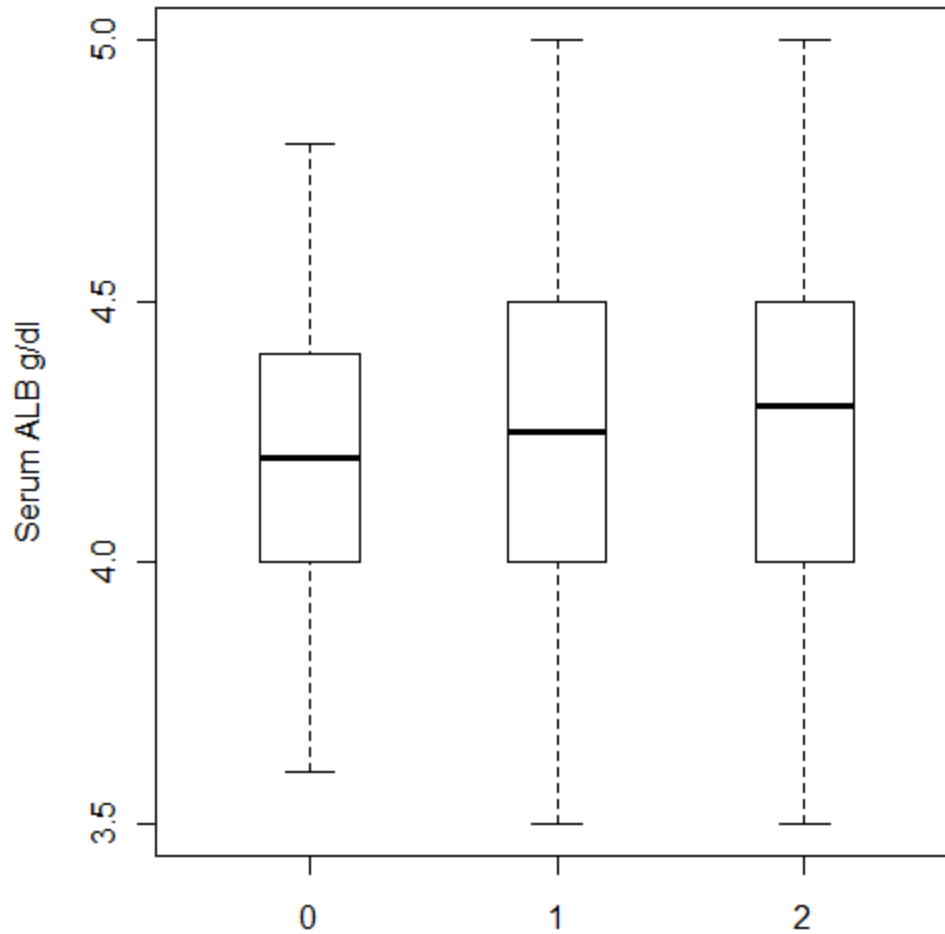

Number

2,254

5,289

3,130

Average/genotype (g/dl)

4.18

4.21

4.26
